# Supplementary material for: Trends in Well-Child Visits and Routine Vaccination among Children of U.S. Military Members: An Evaluation of the COVID-19 Pandemic Effects
Source: MDPI journal article supplement (doi:10.3390/jcm11226842), 2022-11-19
Supplement: s1 [file s1]

**Supplemental Table S1:** Well-Child Visit ICD and CPT codes.

| Z00.01    | Encounter for general adult medical examination with abnormal findings                                                                                                                 |
|-----------|----------------------------------------------------------------------------------------------------------------------------------------------------------------------------------------|
| Z00.110   | examination under 8 days old                                                                                                                                                           |
| Z00.111   | examination 8 to 28 days old; weight check                                                                                                                                             |
| Z00.121   | examination over 28 days old with abnormal finding                                                                                                                                     |
| Z00.129   | examination of infant or child over 28 days                                                                                                                                            |
| Z00.20    | routine examination for period of rapid growth                                                                                                                                         |
| Z00.30    | evaluation for developmental state of adolescence                                                                                                                                      |
| Z02.5     | examination for sports                                                                                                                                                                 |
| Z76.1     | healthy infant or child                                                                                                                                                                |
| Z76.2     | well-baby- well-child                                                                                                                                                                  |
| CPT Codes | Description                                                                                                                                                                            |
| 99381     | The provider performs a well–baby visit for a child under the age of one.                                                                                                              |
| 99382     | The provider performs a well–patient visit for a child who is between the ages of 1 and 4 who meets the definition of new patient.                                                     |
| 99391     | Preventive medicine services are provided to individuals who are not in need of any immediate medical attention but need to undergo a periodic health checkup as a preventive measure. |
| 99392     | Preventive medicine services are provided to individuals who are not in need of any immediate medical attention, but need to undergo a periodic health checkup as a preventive measure |

|       |                                                                                                                                                                                        |
|-------|----------------------------------------------------------------------------------------------------------------------------------------------------------------------------------------|
| 99461 | The provider evaluates and manages the care of a normal newborn infant, typically immediately after birth, at a location other than a hospital or birthing center.                     |
| 99383 | The provider performs a well-patient visit for a child who is between the ages of 5 and 11                                                                                             |
| 99392 | Preventive medicine services are provided to individuals who are not in need of any immediate medical attention but need to undergo a periodic health checkup as a preventive measure. |
| 99382 | The provider performs a well-patient visit for a child who is between the ages of 1 and 4 who meets the definition of new patient.                                                     |

**Supplemental Table S2: Vaccination CPT Codes.**

| Childhood Vaccinations        | CPT Code | Description                                                                                                                                                                                                                                        |
|-------------------------------|----------|----------------------------------------------------------------------------------------------------------------------------------------------------------------------------------------------------------------------------------------------------|
| DTaP                          | 90698    | The provider administers a combination vaccine intramuscularly to protect a patient against five serious diseases: diphtheria, tetanus, pertussis, or whooping cough, <i>Haemophilus influenzae</i> type B infections and poliomyelitis, or polio. |
|                               | 90700    | The provider administers a combination vaccine intramuscularly for diphtheria, tetanus toxoids, and acellular pertussis to individual younger than seven years.                                                                                    |
|                               | 90723    | The provider administers a combination inactivated vaccine intramuscularly to prevent multiple diseases, including diphtheria, tetanus, acellular pertussis, hepatitis B, and polio.                                                               |
| IPV                           | 90698    | The provider administers a combination vaccine intramuscularly to protect a patient against five serious diseases: diphtheria, tetanus, pertussis, or whooping cough, <i>Haemophilus influenzae</i> type B infections and poliomyelitis, or polio. |
|                               | 90713    | The provider administers an inactivated poliovirus vaccine either subcutaneously or intramuscularly to prevent the patient from getting polio.                                                                                                     |
|                               | 90723    | The provider administers a combination inactivated vaccine intramuscularly to prevent multiple diseases, including diphtheria, tetanus, acellular pertussis, hepatitis B, and polio.                                                               |
| Measles                       | 90710    | The provider administers a live combination vaccine for measles, mumps, varicella and rubella virus subcutaneously to prevent these diseases.                                                                                                      |
| MMR (measles, mumps, rubella) | 90707    | The provider administers a live combination vaccine for measles, mumps, varicella and rubella virus subcutaneously to prevent these diseases.                                                                                                      |

|       |       |                                                                                                                                                                                                                                                                                                                                                                                                                         |
|-------|-------|-------------------------------------------------------------------------------------------------------------------------------------------------------------------------------------------------------------------------------------------------------------------------------------------------------------------------------------------------------------------------------------------------------------------------|
| HIB   | 90644 | In this procedure, the provider administers a combination vaccine that protects against specific strains of meningococcus and <i>Haemophilus influenzae</i> type B, bacteria that cause meningitis, a serious disease that attacks the meninges, the covering of the brain and spinal cord. He injects the vaccine into a muscle in an infant between 6 weeks and 18 months of age as part of a multiple dose schedule. |
|       | 90647 | In this procedure, the provider administers a form of the vaccine that protects against <i>Haemophilus influenzae</i> type B, bacteria that causes meningitis, a serious disease that attacks the meninges, the covering of the brain and spinal cord. He injects the vaccine into a muscle as part of a three-dose schedule.                                                                                           |
|       | 90648 | In this procedure, the provider administers a form of the vaccine that protects against <i>Haemophilus influenzae</i> B, bacteria that causes meningitis, a serious disease that attacks the meninges, the covering of the brain and spinal cord. He injects the vaccine into a muscle as part of a four-dose schedule.                                                                                                 |
|       | 90698 | The provider administers a combination vaccine intramuscularly to protect a patient against five serious diseases: diphtheria, tetanus, pertussis, or whooping cough, <i>Haemophilus influenzae</i> type B infections and poliomyelitis, or polio.                                                                                                                                                                      |
|       | 90748 | The provider administers a combination vaccine for hepatitis B and <i>Haemophilus influenzae</i> type B intramuscularly. This vaccine provides protection against hepatitis and influenza.                                                                                                                                                                                                                              |
| Hep B | 90723 | The provider administers a combination inactivated vaccine intramuscularly to prevent multiple diseases, including diphtheria, tetanus, acellular pertussis, hepatitis B, and polio.                                                                                                                                                                                                                                    |
|       | 90740 | The provider administers the hepatitis B vaccine intramuscularly in three separate doses to an immunosuppressed patient or a patient undergoing dialysis.                                                                                                                                                                                                                                                               |
|       | 90744 | The provider administers hepatitis B vaccine intramuscularly in three separate doses to a pediatric or adolescent patient to prevent hepatitis B in the liver.                                                                                                                                                                                                                                                          |
|       | 90747 | The provider uses this vaccine to prevent the hepatitis B virus or HBV infection, a viral infection of the liver.                                                                                                                                                                                                                                                                                                       |
|       | 90748 | The provider administers a combination vaccine for hepatitis B and <i>Haemophilus influenzae</i> type B intramuscularly. This vaccine provides protection against hepatitis and influenza.                                                                                                                                                                                                                              |
| VZV   | 90710 | The provider administers a live combination vaccine for measles, mumps, varicella and rubella virus subcutaneously to prevent these diseases.                                                                                                                                                                                                                                                                           |
|       | 90716 | The provider administers a live vaccine subcutaneously to protect against varicella infection.                                                                                                                                                                                                                                                                                                                          |
| PCV   | 90670 | In this procedure, the provider administers a vaccine that protects infants and young children against 13 specific strains of pneumococcus, a bacterial organism that causes ear infections, pneumonia, and other infectious diseases, including meningitis, a disease that attacks the meninges, the covering of the brain and spinal cord.                                                                            |

|            |       |                                                                                                                                                                                                                                                                   |
|------------|-------|-------------------------------------------------------------------------------------------------------------------------------------------------------------------------------------------------------------------------------------------------------------------|
| Hep A      | 90633 | The provider injects an altered form of the hepatitis A virus into a muscle in a child or teenager to provide immunity to hepatitis A, an infectious disease of the liver, as part of a two-dose schedule                                                         |
| RV Rotarix | 90681 | The provider administers two doses of live attenuated rotavirus vaccine by mouth to prevent rotavirus related gastroenteritis with vomiting and diarrhea.                                                                                                         |
| RV RotaTeq | 90680 | The provider administers three scheduled doses of a live pentavalent rotavirus vaccine by mouth to prevent rotavirus related gastroenteritis that causes vomiting and diarrhea. Prolonged vomiting and diarrhea can lead to dehydration, especially in an infant. |
